# Supplementary material for: Implications of boron doping on electrocatalytic activities of graphyne and graphdiyne families: a first principles study
Source: Royal Society of Chemistry journal article supplement (doi:10.1039/c5cp05768j), 2015-12-21
Supplement: c5cp05768j1.pdf [file c5cp05768j1.pdf]

## Electronic Supplementary Information

### **Implications of boron doping on electrocatalytic activities of graphyne and graphdiyne family: A first principles study**

Bikram Kumar Das<sup>1</sup>, Dipayan Sen<sup>1</sup>, and K. K. Chattopadhyay<sup>1, 2, \*</sup>

1) Thin Film and NanoScience Laboratory, Department of Physics,

Jadavpur University, Kolkata 700032, India

2) School of Materials Science & Nanotechnology,

Jadavpur University, Kolkata 700032, India

\*) Corresponding author; email: [kkc@phys.jdvu.ac.in](mailto:kkc@phys.jdvu.ac.in); Phone: +913324572876

Table S1: properties of optimized structures, B doping percentage and references of prior works of  $\alpha$ Gy,  $\beta$ Gy,  $\gamma$ Gy,  $\delta$ Gy, 6,6,12Gy, RGy and Gdy.

| Structure    | Lattice parameters |       | Space Group | No. of atoms in 2x2 cell | Doping percentage | References of prior works |
|--------------|--------------------|-------|-------------|--------------------------|-------------------|---------------------------|
|              | a (Å)              | b (Å) |             |                          |                   |                           |
| $\alpha$ -Gy | 6.96               | 6.96  | P6/mmm(191) | 32                       | 3.1%              | 1, 2, 3, 4                |
| $\beta$ -Gy  | 9.5                | 9.5   | P6/mmm(191) | 72                       | 1.4%              | 1, 3, 5                   |
| $\gamma$ -Gy | 6.83               | 6.83  | P6/mmm(191) | 48                       | 2.1%              | 1, 3, 4, 6                |
| $\delta$ -Gy | 9.44               | 10.67 | Pm(6)       | 80                       | 1.3%              | 7                         |
| Gdy          | 9.46               | 9.46  | P6/mmm(191) | 72                       | 1.4%              | 4, 8, 9                   |
| 6,6,12-Gy    | 10.16              | 6.89  | Pmmm(47)    | 72                       | 1.4%              | 1, 10                     |
| R-Gy         | 6.02               | 6.02  | P4/mmm(123) | 32                       | 3.1%              | 11                        |

Table S2: Parameters of single B doping in pristine Gy/ Gdy systems for all other considered systems;  $E_{\text{for}}$  is the formation energy of the B doped configurations,  $Q_B$  is the Bader charge transfer from dopant B atom.

| B doped configuration                              | $E_{\text{for}}$ (eV) | $Q_B$ (e) |
|----------------------------------------------------|-----------------------|-----------|
| $\text{Ch}_{\text{sp}}\text{-}\alpha\text{Gy}$     | 1.874                 | 1.74      |
| $\text{Ch}_{\text{sp}}\text{-}\beta\text{Gy}$      | 1.466                 | 1.76      |
| $\text{Ch}_{\text{sp}}\text{-}\gamma\text{Gy}$     | 1.766                 | 1.79      |
| $\text{H}_{\text{sp}2}\text{-}\delta\text{Gy}$     | 1.155                 | 1.87      |
| $\text{Ch}_{\text{sp}}\text{-}\delta\text{Gy}$     | 1.915                 | 1.76      |
| $\text{Ch}_{\text{sp}}^{\text{n}}\text{-Gdy}$      | 1.446                 | 1.77      |
| $\text{Ch}_{\text{sp}}^{\text{f}}\text{-Gdy}$      | 1.508                 | 1.81      |
| $\text{H}_{\text{sp}2}\text{-6,6,12Gy}$            | 0.367                 | 1.92      |
| $\text{H}_{\text{sp}2}^{\text{x}}\text{-6,6,12Gy}$ | 0.615                 | 1.89      |
| $\text{Ch}_{\text{sp}}^{\text{n}}\text{-6,6,12Gy}$ | 1.490                 | 1.77      |
| $\text{Ch}_{\text{sp}}\text{-6,6,12Gy}$            | 1.486                 | 1.74      |
| $\text{Ch}_{\text{sp}}\text{-RGy}$                 | 1.717                 | 1.78      |

Table S3: Parameters for O<sub>2</sub> adsorption on B doped Gy/ Gdy hosts for all other considered structures; E<sup>do</sup><sub>ads</sub> is the O<sub>2</sub> adsorption energy, d<sub>O-O</sub> is the bond length of O<sub>2</sub> in adsorbed state, Δd<sub>O-O</sub> is the amount of stretching occurred after adsorption, d<sub>O(B)-Gy/ Gdy</sub> is the distance of the O atom adsorbed on B from the Gy/ Gdy plane, d<sub>O(C)-Gy/ Gdy</sub> is the distance of O atom adsorbed on C from the Gy/ Gdy plane, Q<sub>O</sub> is the bader charge transferred to the O<sub>2</sub> molecule during adsorption.

| Configuration               | O <sub>2</sub> adsorption site | Adsorption energy (eV) | Stretched bond length (Å <sup>0</sup> ) | Bond stretching (%) | d <sub>O(B)-Gy/ Gdy</sub> (Å <sup>0</sup> ) | d <sub>O(C)-Gy/ Gdy</sub> (Å <sup>0</sup> ) | Total charge transfer to O <sub>2</sub> molecule (e) |
|-----------------------------|--------------------------------|------------------------|-----------------------------------------|---------------------|---------------------------------------------|---------------------------------------------|------------------------------------------------------|
| H <sub>sp2</sub> -βGy       | B-C <sub>sp2</sub> bridge      | -0.03                  | 1.448                                   | 16.59               | 1.544                                       | 1.507                                       | 0.53                                                 |
| H <sub>sp2</sub> -γGy       | B-C <sub>sp</sub> bridge       | 0.161                  | 1.308                                   | 5.31                | 1.622                                       | -                                           | 0.93                                                 |
| H <sub>sp2</sub> -Gdy       | B-C <sub>sp2</sub> bridge      | -0.037                 | 1.455                                   | 17.15               | 1.540                                       | 1.502                                       | 0.96                                                 |
| Ch <sub>sp2</sub> -6,6,12Gy | B-C <sub>sp2</sub> bridge      | 0.429                  | 1.315                                   | 5.88                | 1.607                                       | 2.601                                       | 0.57                                                 |
| R <sub>sp2</sub> -RGy       | B-C <sub>sp2</sub> bridge      | -0.098                 | 1.469                                   | 18.28               | 1.522                                       | 1.482                                       | 1.00                                                 |

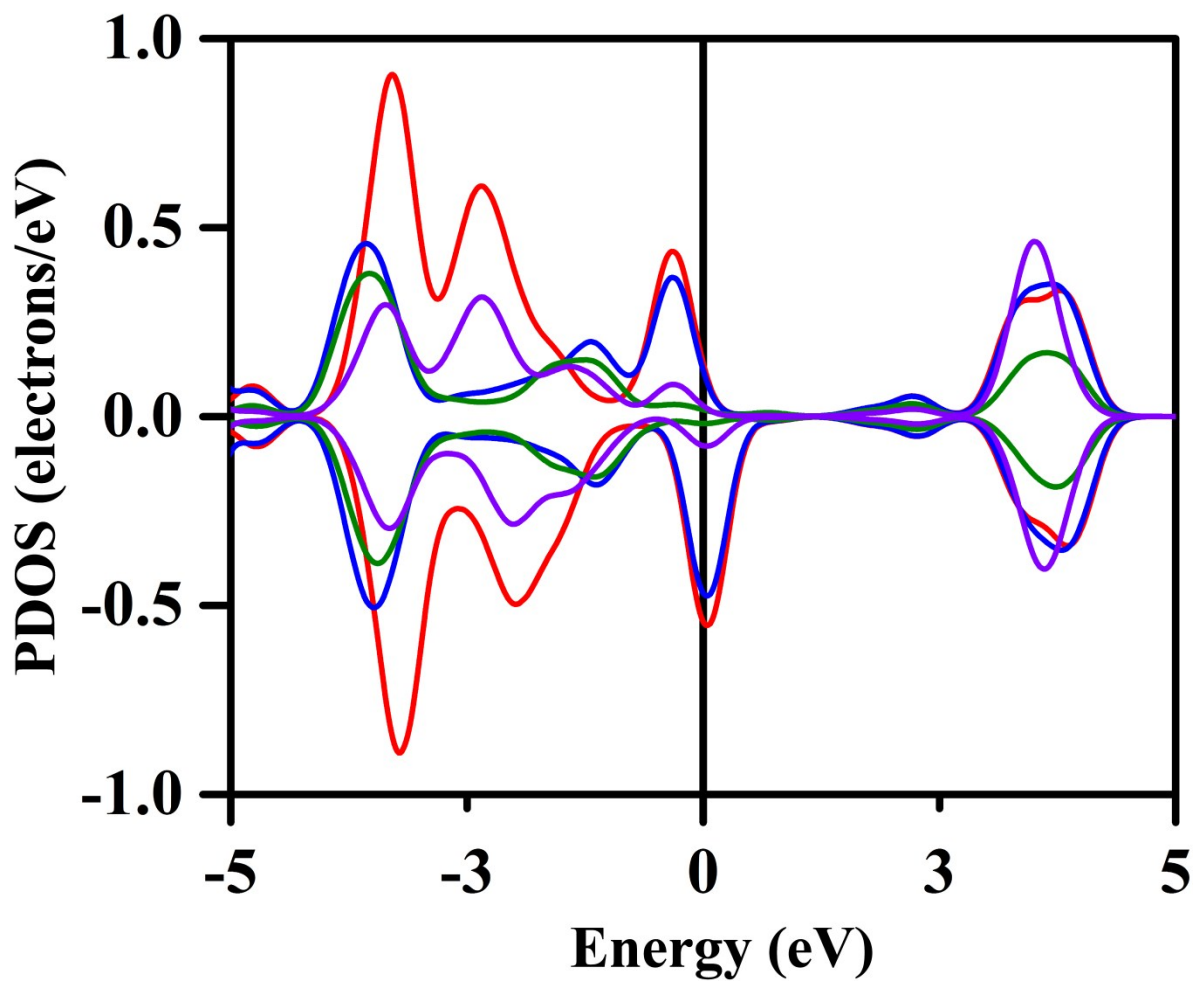

Figure S1. PDOS of dioxygen adsorbed on B-C<sub>sp</sub> bridge of B doped R-S<sub>sp2</sub>Gy configuration. Red and blue lines represent the PDOS of O<sub>B</sub> and O<sub>C</sub> p states respectively. Green and violet lines represent the B and C p states respectively.

1. N. K. Perkgöz and C. Sevik, *Nanotechnology*, 2014, **25**, 185701.
2. V. O. Özçelik and S. Ciraci, *The Journal of Physical Chemistry C*, 2013, **117**, 2175-2182.
3. B. G. Kim and H. J. Choi, *Physical Review B*, 2012, **86**, 115435.
4. Y. Li, L. Xu, H. Liu and Y. Li, *Chemical Society Reviews*, 2014, **43**, 2572-2586.
5. T. Ouyang and M. Hu, *Nanotechnology*, 2014, **25**, 245401.
6. J. M. Kehoe, J. H. Kiley, J. J. English, C. A. Johnson, R. C. Petersen and M. M. Haley, *Organic letters*, 2000, **2**, 969-972.
7. M. Zhao, W. Dong and A. Wang, *Scientific reports*, 2013, **3**.
8. M. M. Haley, S. C. Brand and J. J. Pak, *Angewandte Chemie International Edition in English*, 1997, **36**, 836-838.
9. G. Li, Y. Li, H. Liu, Y. Guo, Y. Li and D. Zhu, *Chemical Communications*, 2010, **46**, 3256-3258.
10. J. Chen, J. Xi, D. Wang and Z. Shuai, *The Journal of Physical Chemistry Letters*, 2013, **4**, 1443-1448.
11. W.-J. Yin, Y.-E. Xie, L.-M. Liu, R.-Z. Wang, X.-L. Wei, L. Lau, J.-X. Zhong and Y.-P. Chen, *Journal of Materials Chemistry A*, 2013, **1**, 5341-5346.
